# Supplementary material for: Low-temperature thermal oxidation of biomass jet fuel pinane
Source: Royal Society of Chemistry journal article supplement (doi:10.1039/d3se00889d), 2023-01-01
Supplement: d3se00889d1.pdf [file d3se00889d1.pdf]

## *Supporting Information*

### **Low-Temperature Thermal Oxidation of Biomass Jet Fuel**

#### **Pinane**

*Ji Mi<sup>a, b, c</sup>, Xinyang Chen<sup>a, c</sup>, Panxi Wu<sup>a</sup>, Yitong Dai<sup>a, b\*\*</sup>, Yongsheng Guo<sup>a, b\*</sup>, and Wenjun Fang<sup>a, b</sup>*

<sup>a</sup> Department of Chemistry, Zhejiang University, Hangzhou 310058, China

<sup>b</sup> Center of Chemistry for Frontier Technologies, Zhejiang University, Hangzhou 310058, China

<sup>c</sup> These authors contributed equally to this work: Ji Mi and Xinyang Chen.

\* Yongsheng Guo: E-mail: [wjjw@zju.edu.cn](mailto:wjjw@zju.edu.cn). Tel/Fax: +86-571-88981416.

\*\* Yitong Dai: [dyt212901@163.com](mailto:dyt212901@163.com). Tel/Fax: +86-571-88981416.

**Table S1.** Physicochemical properties of pinane and typical hydrocarbon fuels

| Properties                                                                 |          | pinane                          | JP-10 <sup>a</sup>              | RP-3 <sup>b</sup>      |
|----------------------------------------------------------------------------|----------|---------------------------------|---------------------------------|------------------------|
| Molecular formula                                                          |          | C <sub>10</sub> H <sub>18</sub> | C <sub>10</sub> H <sub>16</sub> | -                      |
| Molecular weight                                                           |          | 138                             | 136                             | -                      |
| Appearance                                                                 |          | clear colorless liquid          | clear colorless liquid          | clear colorless liquid |
| Color / Saybolt number                                                     |          | >+30                            | +25                             | +25                    |
| Index of refraction at 298 K                                               |          | 1.4605 <sup>c</sup>             | -                               | -                      |
| Dissolved oxygen at 298 K / ppm                                            |          | 7.5                             | 10 <sup>f</sup>                 | -                      |
| Solubility in water at 298 K / mg·L <sup>-1</sup>                          |          | 6.01 <sup>c</sup>               | -                               | -                      |
| Density / g·cm <sup>-3</sup>                                               | at 293 K | 0.8576                          | 0.9359 <sup>f</sup>             | 0.775 ~ 0.830          |
|                                                                            | at 333 K | 0.8261                          | 0.9045 <sup>f</sup>             | -                      |
| Viscosity / mPa·s                                                          | at 298 K | 2.02                            | 2.99 <sup>f</sup>               | 0.97 ~ 1.04            |
|                                                                            | at 333 K | 1.13                            | 1.52 <sup>f</sup>               | -                      |
| Kinematic viscosity / mm <sup>2</sup> ·s <sup>-1</sup>                     | at 253K  | 7.15                            | 10 (255 K)                      | 8.0                    |
|                                                                            | at 233K  | 14.48                           | 40 (219 K)                      | -                      |
| Heat conductivity coefficient at 295K / W·m <sup>-1</sup> ·K <sup>-1</sup> |          | 0.1429                          | 0.1483                          | -                      |
| Boiling point / K                                                          |          | 440 <sup>d</sup>                | 458                             | <478 ~ <573            |
| Vapor Pressure at 298K / mm Hg                                             |          | 2.19 <sup>c</sup>               | -                               | -                      |
| Melting point / K                                                          |          | 220                             | 194 <sup>f</sup>                | 226                    |
| Flash point / K                                                            |          | 314                             | 327                             | 311                    |
| Autoignition temperature / K                                               |          | 546 <sup>e</sup>                | -                               | -                      |
| Ignition delay time / s                                                    | at 848 K | 1.53                            | 2.20                            | -                      |
|                                                                            | at 873 K | 0.33                            | 1.07                            | -                      |
| Evaporation rate constant                                                  | at 773 K | 0.45                            | 0.39                            | -                      |
|                                                                            | at 789 K | 0.62                            | -                               | -                      |
|                                                                            | at 823 K | 0.85                            | -                               | -                      |
| Enthalpy of combustion / MJ·kg <sup>-1</sup>                               |          | 41.5                            | 42.1                            | 42.8                   |

<sup>a</sup> Data is obtained from MIL-DTL-87107E.

<sup>b</sup> Data is obtained from GB 6537-2018.

<sup>c</sup> Data is obtained from Hazardous Substances Data Bank.

<sup>d</sup> Data is obtained from NIST Standard Reference Database.

<sup>e</sup> Data is obtained from CAMEO Chemicals.

<sup>f</sup> Data is determined by DSC.

**Table S2-1.** Typical composition of oxidized pinane samples (90 °C, 1 MPa O<sub>2</sub>)<sup>a</sup>

| No. | Most Possible Match                      | RT    | Relative Contents (mol%) |       |       |       |       |       |       |
|-----|------------------------------------------|-------|--------------------------|-------|-------|-------|-------|-------|-------|
|     |                                          |       | Reaction time (min)      |       |       |       |       |       |       |
|     |                                          |       | 0                        | 15    | 30    | 45    | 60    | 75    | 90    |
| 2   | 1-methyl-4-(prop-1-en-2-yl)cyclohexane   | 8.43  | 0.61                     | 0.62  | 0.63  | 0.62  | 0.63  | 0.63  | 0.63  |
| 3   | 1-methyl-4-(prop-1-2-ylidene)cyclohexane | 8.51  | 0.26                     | 0.27  | 0.27  | 0.27  | 0.27  | 0.27  | 0.27  |
| 4   | <i>cis</i> -pinane-2-ene                 | 8.60  | 0.75                     | 0.76  | 0.75  | 0.74  | 0.73  | 0.73  | 0.71  |
| 5   | 1-isopropyl-4-ethylcyclohex-1-ene        | 8.83  | 0.19                     | 0.19  | 0.19  | 0.19  | 0.19  | 0.19  | 0.19  |
| 6   | <i>trans</i> -pinane                     | 9.17  | 11.89                    | 12.18 | 12.16 | 12.10 | 12.14 | 12.16 | 12.07 |
| 7   | <i>cis</i> -pinane                       | 9.35  | 86.22                    | 85.66 | 85.04 | 84.64 | 84.05 | 83.51 | 82.95 |
| 19  | <i>trans</i> -pinane-2-ol                | 13.98 |                          |       | 0.17  | 0.25  | 0.33  | 0.42  | 0.52  |
| 20  | <i>cis</i> -pinane-2-ol                  | 14.45 | 0.08                     | 0.31  | 0.79  | 1.18  | 1.57  | 1.98  | 2.52  |
| 21  | <i>cis</i> -pinane-3-one                 | 14.62 |                          |       |       |       | 0.08  | 0.10  | 0.13  |

<sup>a</sup> blank indicates the product is not detected.

**Table S2-2.** Typical composition of oxidized pinane samples (100 °C, 1 MPa O<sub>2</sub>)

| No. | Most Possible Match                                      | RT    | Relative Contents (mol%) |       |       |       |       |       |       |
|-----|----------------------------------------------------------|-------|--------------------------|-------|-------|-------|-------|-------|-------|
|     |                                                          |       | Reaction time (min)      |       |       |       |       |       |       |
|     |                                                          |       | 0                        | 15    | 30    | 45    | 60    | 75    | 90    |
| 2   | 1-methyl-4-(prop-1-en-2-yl)cyclohexane                   | 8.43  | 0.63                     | 0.63  | 0.62  | 0.61  | 0.61  | 0.60  | 0.58  |
| 3   | 1-methyl-4-(prop-1-2-ylidene)cyclohexane                 | 8.51  | 0.27                     | 0.27  | 0.26  | 0.25  | 0.25  | 0.24  | 0.23  |
| 4   | <i>cis</i> -pinane-2-ene                                 | 8.60  | 0.76                     | 0.75  | 0.73  | 0.68  | 0.66  | 0.61  | 0.57  |
| 5   | 1-isopropyl-4-ethylcyclohex-1-ene                        | 8.83  | 0.19                     | 0.18  | 0.18  | 0.18  | 0.18  | 0.18  | 0.17  |
| 6   | <i>trans</i> -pinane                                     | 9.17  | 12.05                    | 12.07 | 11.87 | 11.58 | 11.57 | 11.24 | 11.03 |
| 7   | <i>cis</i> -pinane                                       | 9.35  | 86.00                    | 84.65 | 82.42 | 81.13 | 78.96 | 77.26 | 74.39 |
| 14  | 3-hydroxy-4,6,6-trimethylbicyclo[3.1.1]heptane-2-one     | 11.91 |                          |       |       |       | 0.13  | 0.17  | 0.26  |
| 15  | 2-methyl-5-(prop-1-en-2-yl)cyclohexan-1-one              | 12.43 |                          |       |       |       | 0.07  | 0.10  | 0.14  |
| 19  | <i>trans</i> -pinane-2-ol                                | 13.98 |                          | 0.25  | 0.63  | 0.90  | 1.26  | 1.62  | 2.17  |
| 20  | <i>cis</i> -pinane-2-ol                                  | 14.45 | 0.10                     | 1.19  | 3.00  | 4.28  | 5.77  | 7.34  | 9.58  |
| 21  | <i>cis</i> -pinane-3-one                                 | 14.62 |                          |       | 0.21  | 0.30  | 0.41  | 0.48  | 0.67  |
| 22  | 6-(hydroxymethyl)-2,6-dimethylbicyclo[3.1.1]heptane-2-ol | 14.93 |                          |       | 0.07  | 0.10  | 0.13  | 0.16  | 0.21  |

**Table S2-3.** Typical composition of oxidized pinane samples (110 °C, 1 MPa O<sub>2</sub>)

| No. | Most Possible Match                                      | RT    | Relative Contents (mol%) |       |       |       |       |       |       |
|-----|----------------------------------------------------------|-------|--------------------------|-------|-------|-------|-------|-------|-------|
|     |                                                          |       | Reaction time (min)      |       |       |       |       |       |       |
|     |                                                          |       | 0                        | 15    | 30    | 45    | 60    | 75    | 90    |
| 1   | acetone                                                  | 4.32  |                          |       |       |       |       |       | 0.45  |
| 2   | 1-methyl-4-(prop-1-en-2-yl)cyclohexane                   | 8.43  | 0.58                     | 0.58  | 0.58  | 0.56  | 0.55  | 0.51  | 0.48  |
| 3   | 1-methyl-4-(prop-1-2-ylidene)cyclohexane                 | 8.51  | 0.25                     | 0.25  | 0.24  | 0.23  | 0.22  | 0.19  | 0.17  |
| 4   | <i>cis</i> -pinane-2-ene                                 | 8.60  | 0.71                     | 0.69  | 0.63  | 0.57  | 0.50  | 0.44  | 0.50  |
| 5   | 1-isopropyl-4-ethylcyclohex-1-ene                        | 8.83  | 0.17                     | 0.17  | 0.17  | 0.16  | 0.15  | 0.16  | 0.16  |
| 6   | <i>trans</i> -pinane                                     | 9.17  | 11.42                    | 11.26 | 11.00 | 10.71 | 10.19 | 9.44  | 9.01  |
| 7   | <i>cis</i> -pinane                                       | 9.35  | 86.66                    | 83.79 | 78.70 | 73.86 | 68.94 | 62.78 | 56.96 |
| 8   | 4-isopropyl-1-methylcyclohex-1-ene                       | 9.95  |                          |       |       |       |       |       | 0.14  |
| 10  | 4-isopropyl-1-methylcyclohex-2-ene-1-ol                  | 10.97 |                          |       |       |       |       |       | 0.10  |
| 12  | 4-methyl-3-(prop-1-en-2-yl)cyclohexan-1-one              | 11.59 |                          |       |       |       |       |       | 0.21  |
| 14  | 3-hydroxy-4,6,6-trimethylbicyclo[3.1.1]heptane-2-one     | 11.92 |                          |       | 0.16  | 0.29  | 0.48  | 0.83  | 1.48  |
| 15  | 2-methyl-5-(prop-1-en-2-yl)cyclohexan-1-one              | 12.43 |                          |       |       | 0.13  | 0.21  | 0.33  | 0.50  |
| 16  | 6-isopropyl-3-methylcyclohex-2-en-1-one                  | 12.57 |                          |       |       |       |       |       | 0.07  |
| 17  | 5-methyl-2-(prop-1-en-2-yl)cyclohexan-1-one              | 12.92 |                          |       |       | 0.08  | 0.14  | 0.24  | 0.41  |
| 19  | <i>trans</i> -pinane-2-ol                                | 13.98 |                          | 0.53  | 1.39  | 2.27  | 3.17  | 4.35  | 5.30  |
| 20  | <i>cis</i> -pinane-2-ol                                  | 14.45 | 0.21                     | 2.54  | 6.46  | 10.09 | 13.88 | 18.20 | 21.41 |
| 21  | <i>cis</i> -pinane-3-one                                 | 14.62 |                          | 0.19  | 0.50  | 0.77  | 1.08  | 1.40  | 1.67  |
| 22  | 6-(hydroxymethyl)-2,6-dimethylbicyclo[3.1.1]heptane-2-ol | 14.93 |                          |       | 0.17  | 0.27  | 0.42  | 0.53  | 0.67  |
| 23  | unidentified                                             | 15.84 |                          |       |       |       |       | 0.49  | 0.11  |
| 24  | unidentified                                             | 17.38 |                          |       |       |       | 0.06  | 0.11  | 0.22  |

**Table S2-4.** Typical composition of oxidized pinane samples (120 °C, 1 MPa O<sub>2</sub>)

| No. | Most Possible Match                                      | RT    | Relative Contents (mol%) |       |       |       |       |       |       |
|-----|----------------------------------------------------------|-------|--------------------------|-------|-------|-------|-------|-------|-------|
|     |                                                          |       | Reaction time (min)      |       |       |       |       |       |       |
|     |                                                          |       | 0                        | 15    | 30    | 45    | 60    | 75    | 90    |
| 1   | acetone                                                  | 4.32  |                          |       | 0.25  | 0.97  | 1.84  | 2.83  | 3.76  |
| 2   | 1-methyl-4-(prop-1-en-2-yl)cyclohexane                   | 8.43  | 0.61                     | 0.57  | 0.56  | 0.56  | 0.57  | 0.59  | 0.61  |
| 3   | 1-methyl-4-(prop-1-2-ylidene)cyclohexane                 | 8.51  | 0.26                     | 0.23  | 0.22  | 0.19  | 0.18  | 0.17  | 0.17  |
| 4   | <i>cis</i> -pinane-2-ene                                 | 8.60  | 0.75                     | 0.70  | 0.85  | 1.24  | 2.00  | 2.15  | 2.17  |
| 5   | 1-isopropyl-4-lethylcyclohex-1-ene                       | 8.83  | 0.19                     | 0.17  | 0.20  | 0.31  | 0.55  | 0.71  | 0.86  |
| 6   | <i>trans</i> -pinane                                     | 9.17  | 11.88                    | 10.97 | 10.49 | 9.94  | 9.85  | 9.86  | 10.11 |
| 7   | <i>cis</i> -pinane                                       | 9.35  | 85.73                    | 78.60 | 67.45 | 59.84 | 55.15 | 53.52 | 54.03 |
| 8   | 4-isopropyl-1-methylcyclohex-1-ene                       | 9.95  |                          |       | 0.64  | 1.53  | 2.32  | 2.05  | 1.83  |
| 9   | 3-isopropyl-6-methylcyclohex-1-ene                       | 10.05 |                          |       |       | 0.16  | 0.42  | 0.53  | 0.70  |
| 10  | 4-isopropyl-1-methylcyclohex-2-ene-1-ol                  | 10.97 |                          |       | 0.37  | 2.27  | 6.38  | 7.98  | 8.80  |
| 11  | <i>trans</i> -pinane-3-ol                                | 11.37 |                          |       |       | 0.29  | 0.83  | 1.05  | 1.18  |
| 12  | 4-methyl-3-(prop-1-en-2-yl)cyclohexan-1-one              | 11.59 |                          |       | 0.15  | 0.60  | 1.22  | 1.47  | 1.34  |
| 13  | 4-methyl-3-(propan-2-ylidene)cyclohexan-1-one            | 11.86 |                          |       | 0.12  | 0.57  | 1.36  | 1.59  | 1.58  |
| 14  | 3-hydroxy-4,6,6-trimethylbicyclo[3.1.1]heptane-2-one     | 11.92 |                          | 0.20  | 1.05  | 2.97  | 3.55  | 2.72  | 1.30  |
| 15  | 2-methyl-5-(prop-1-en-2-yl)cyclohexan-1-one              | 12.43 |                          |       | 0.36  | 0.93  | 1.34  | 1.66  | 1.65  |
| 16  | 6-isopropyl-3-methylcyclohex-2-en-1-one                  | 12.57 |                          |       | 0.34  | 1.09  | 1.88  | 2.10  | 2.26  |
| 17  | 5-methyl-2-(prop-1-en-2-yl)cyclohexan-1-one              | 12.92 |                          |       | 0.24  | 0.62  | 1.02  | 1.29  | 1.46  |
| 18  | unidentified                                             | 13.05 |                          |       |       |       |       | 0.01  | 0.02  |
| 19  | <i>trans</i> -pinane-2-ol                                | 13.98 | 0.11                     | 1.36  | 2.71  | 2.78  | 1.44  | 1.03  | 0.83  |
| 20  | <i>cis</i> -pinane-2-ol                                  | 14.45 | 0.48                     | 6.45  | 11.92 | 10.88 | 5.51  | 3.66  | 2.25  |
| 21  | <i>cis</i> -pinane-3-one                                 | 14.62 |                          | 0.55  | 1.27  | 1.06  | 0.65  | 0.60  | 0.45  |
| 22  | 6-(hydroxymethyl)-2,6-dimethylbicyclo[3.1.1]heptane-2-ol | 14.93 |                          | 0.20  | 0.63  | 0.77  | 1.16  | 1.47  | 1.61  |
| 23  | unidentified                                             | 15.84 |                          |       | 0.11  | 0.25  | 0.38  | 0.48  | 0.48  |
| 24  | unidentified                                             | 17.38 |                          |       | 0.05  | 0.19  | 0.39  | 0.50  | 0.56  |

**Table S3.** C-H BDEs of *trans*-pinane using different basis sets (kJ/mol)

|    | M06        |             |            | B3LYP w/DFT-D3 |             |            |
|----|------------|-------------|------------|----------------|-------------|------------|
|    | 6-31G(d,p) | 6-311G(d,p) | def2-TZVPP | 6-31G(d,p)     | 6-311G(d,p) | def2-TZVPP |
| 1  | 437.8      | 422.9       | 422.3      | 429.9          | 424.8       | 424.7      |
| 2  | 385.0      | 381.7       | 378.8      | 387.0          | 381.4       | 381.1      |
| 3  | 392.0      | 379.9       | 380.8      | 389.5          | 383.9       | 383.8      |
| 4  | 408.1      | 391.8       | 390.5      | 399.8          | 393.6       | 393.1      |
| 5  | 437.6      | 422.0       | 421.3      | 429.6          | 424.7       | 424.4      |
| 7  | 430.5      | 412.6       | 412.1      | 426.0          | 418.4       | 418.8      |
| 8  | 428.9      | 420.3       | 419.3      | 426.4          | 419.6       | 418.9      |
| 9  | 432.7      | 415.3       | 440.8      | 421.9          | 416.8       | 416.7      |
| 10 | 419.8      | 401.2       | 415.6      | 418.4          | 411.5       | 411.1      |

**Table S4.** C-C BDEs of *trans*-pinane using different basis sets (kJ/mol)

|      | M06        |             |            | B3LYPw/DFT-D3 |             |            |
|------|------------|-------------|------------|---------------|-------------|------------|
|      | 6-31G(d,p) | 6-311G(d,p) | def2-TZVPP | 6-31G(d,p)    | 6-311G(d,p) | def2-TZVPP |
| 1-2  | 318.2      | 312.5       | 307.1      | 306.5         | 301.5       | 296.4      |
| 2-3  | 306.0      | 300.0       | 294.6      | 297.2         | 290.6       | 285.6      |
| 3-4  | 323.4      | 316.4       | 312.4      | 316.3         | 310.1       | 306.8      |
| 4-5  | 340.0      | 330.3       | 329.7      | 329.0         | 325.1       | 321.2      |
| 5-6  | 204.1      | 197.4       | 193.0      | 193.5         | 185.4       | 181.4      |
| 1-6  | 212.5      | 207.7       | 204.2      | 203.2         | 198.2       | 196.0      |
| 1-7  | 235.7      | 228.6       | 225.8      | 225.1         | 218.7       | 216.3      |
| 5-7  | 229.6      | 219.6       | 218.8      | 222.8         | 215.4       | 213.7      |
| 2-8  | 362.3      | 354.7       | 347.0      | 352.0         | 341.9       | 353.8      |
| 6-9  | 373.4      | 360.8       | 353.5      | 362.9         | 345.5       | 358.7      |
| 6-10 | 377.0      | 370.8       | 363.5      | 362.9         | 357.8       | 359.4      |

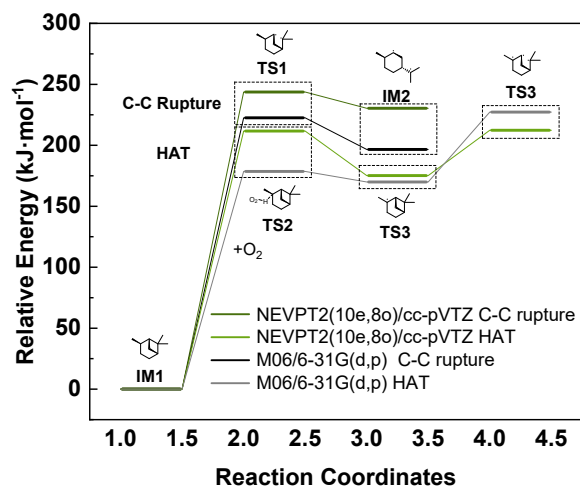

**Fig. S1.** The energy profiles of pinane to form terpane skeleton products
